# Supplementary material
Source: HighWire-hosted journal article supplement (http://www.ajnr.org/highwire/filestream/66336/field_highwire_adjunct_files/0/18-00078.pdf)
Supplement: 18-00078.pdf [file 18-00078.pdf]

## ON-LINE APPENDIX: DETAILS OF TEXTURE ANALYSIS

We measured 41 features from each segmented tissue volume using in-house-developed Matlab texture-analysis software.<sup>1,2</sup> The 41 features included 12 histogram features, 5 GLCM features, 11 GLRL features, 4 GLGM features, and 9 Laws features. The extraneous math behind each texture feature in detail is described as follows.

### Histogram Features

The histogram features included mean, median, SD, entropy, second SD, range, geometric mean, harmonic mean, interquartile range, fourth moment, SD in a 5-pixel neighborhood (SD 5), and SD in a 9-pixel neighborhood (SD 9). SD 5 and SD 9 are SDs calculated on the basis of a pixel and its surrounding 4 and 8 pixels, thus creating a 5- and 9-pixel neighborhood, respectively. Histogram features are spatially invariant and are not affected by relationships with neighboring pixels.<sup>3</sup>

### Gray-Level Co-Occurrence Matrix Features

The GLCM features, in contrast to histogram features, are spatially dependent and are influenced by relationships with surrounding pixels. The GLCM is square and symmetric with rows and columns from 0 to  $N_g$ , where  $N_g$  represents the number of gray tones in the image. This notation allows the GLCM element in row  $i$  and column  $j$  to represent the number of times a given gray tone of value  $i$  is horizontally adjacent to gray tone  $j$  in the original quantized image. Herein, GLCMs were calculated using only directly adjacent pixels for simplicity. Horizontal, 45°, vertical, and 135° directions were averaged to eliminate any directional dependence. We tested the following GLCM features proposed by Haralick et al.<sup>4</sup>:

- 1) Contrast =  $\sum_{i,j} |i - j|^2 p(i, j)$
- 2) Correlation =  $\sum_{i,j} \frac{(i - \mu_i)(j - \mu_j) p(i, j)}{\sigma_i \sigma_j}$
- 3) Angular Second Moment =  $\sum_{i,j} p(i, j)^2$
- 4) Homogeneity =  $\sum_{i,j} \frac{p(i, j)}{1 + |i - j|}$
- 5) Entropy =  $\sum_{i,j} \ln(p(i, j)) p(i, j)$

where  $p(i, j)$  represents the  $(i, j)$  value of the GLCM.

### Gray-Level Run-Length Features

The GLRL matrix provides additional insights into a spatial dependence and was created on the basis of the published work of Tang.<sup>5</sup> Similar to the GLCM, the GLRL matrix is quantized to  $N_g$  gray tones to simplify texture extraction and to yield a more robust technique. The row index  $i$  of the GLRL matrix represents the gray tone of value  $i$ . In contrast, the column index  $j$  is the run-length, which is defined as a number of adjacent and equal-value pixels in a given direction. The value of each element in the GLRL matrix represents the number of pixel line segments (run) with run-length  $j$  and gray tone  $i$ . The same directions considered in

GLCM were averaged for the GLRL matrix. The features explored included equations using SRE, LRE, GLN, RLN, RP, LGRE, HGRE, SRLGE, short-run high gray-level emphasis (SRHGE), long-run low gray-level emphasis (LRLGE), and LRHGE, defined as follows:

- 6) SRE =  $\frac{1}{n_r} \sum_{i,j} \frac{p(i, j)}{j^2}$
- 7) LRE =  $\frac{1}{n_r} \sum_{i,j} p(i, j) j^2$
- 8) GLN =  $\frac{1}{n_r} \sum_i \left( \sum_j p(i, j) \right)^2$
- 9) RLN =  $\frac{1}{n_r} \sum_j \left( \sum_i p(i, j) \right)^2$
- 10) RP =  $\frac{n_r}{n_p}$
- 11) LGRE =  $\frac{1}{n_r} \sum_{i,j} \frac{p(i, j)}{i^2}$
- 12) HGRE =  $\frac{1}{n_r} \sum_{i,j} p(i, j) i^2$
- 13) SRLGE =  $\frac{1}{n_r} \sum_{i,j} \frac{p(i, j)}{i^2 j^2}$
- 14) SRHGE =  $\frac{1}{n_r} \sum_{i,j} \frac{p(i, j) i^2}{j^2}$
- 15) LRLGE =  $\frac{1}{n_r} \sum_{i,j} \frac{p(i, j) j^2}{i^2}$
- 16) LRHGE =  $\sum_{i,j} p(i, j) i^2 j^2$

where  $p(i, j)$  represents the  $(i, j)$  value of the GLRL matrix,  $n_r$  is the total number of runs, and  $n_p$  is the total number of pixels. The images were requantized in the texture analysis program using a standard of 30 gray levels. No smoothing filter was applied to the images in the texture-analysis program. The images were normalized by the mean and SD to minimize discrimination by the overall gray-level variation, which is unrelated to local image texture.

### Gray-Level Gradient Matrix Features

The GLGM was used to provide the histogram of the absolute gradient values in the ROI. As a preprocessing step, the gradient of each pixel within the ROI was computed using a  $3 \times 3$  neighborhood. The GLGM features mathematically summarize the gradient values of the pixels in the ROI and include mean, variance, skewness, and kurtosis.

### Laws Features

The Laws features are based on unidimensional vectors described by Kenneth Laws.<sup>6</sup> Vectors described by Laws included

level, spot, edge, ripple, wave, undulation, and oscillation. The vectors level, edge, ripple, and spot were used for our analysis. Two 5-pixel vectors are convolved to create 2D filter masks, and certain symmetric pairs were combined to form the final 9 filter masks L1–L9,<sup>7</sup> which were applied across an image.

## REFERENCES

1. Buch K, Fujita A, Li B et al. **Using texture analysis to determine human papillomavirus status of oropharyngeal squamous cell carcinomas on CT.** *AJNR Am J Neuroradiol* 2015;36:1343–48 CrossRef Medline
2. Yu H, Buch K, Li B et al. **Utility of texture analysis for quantifying hepatic fibrosis on proton density MR imaging.** *J Magn Reson Imaging* 2015;42:1259–65 CrossRef Medline
3. Castellano G, Bonilha L, Li LM et al. **Texture analysis of medical images.** *Clin Radiol* 2004;59:1061–69 CrossRef Medline
4. Haralick RM, Shanmugam K. **Textural features for image classification.** *IEEE Transactions on Systems, Man, and Cybernetics* 1973:610–21 CrossRef Medline
5. Tang X. **Texture information in run-length matrices.** *IEEE Trans Image Process* 1998;7:1602–09 CrossRef Medline
6. Laws KI. *Textured Image Segmentation* [dissertation and thesis]. Los Angeles: University of Southern California; 1980
7. Li B, Jara H, Yu H et al. **Enhanced Laws textures: a potential MR imaging surrogate marker of hepatic fibrosis in a murine model.** *Magn Reson Imaging* 2017;37:33–40 CrossRef Medline

**On-line Table 1: [<sup>18</sup>F] FDG-PET/CT characteristics and texture parameters differentiating lymph node characterization in patients with HIV infection (group 1 vs 2)**

| Texture Parameter           | Benign Nodes (n = 9) |           | Malignant Nodes (n = 13) |           | P Value <sup>a</sup> | AUC <sup>b</sup> (GLIMMROC) |
|-----------------------------|----------------------|-----------|--------------------------|-----------|----------------------|-----------------------------|
|                             | Mean                 | SD        | Mean                     | SD        |                      |                             |
| <b>Node characteristics</b> |                      |           |                          |           |                      |                             |
| Size (cm)                   | 1.400                | 0.300     | 1.892                    | 0.690     | .024 <sup>c</sup>    | 0.752                       |
| Volume (cm <sup>3</sup> )   | 0.547                | 0.363     | 2.535                    | 2.218     | .007 <sup>c</sup>    | 0.889                       |
| SUVmax                      | 5.111                | 1.610     | 8.562                    | 3.886     | .042 <sup>c</sup>    | 0.803                       |
| <b>Histogram</b>            |                      |           |                          |           |                      |                             |
| Mean                        | 624.4                | 74.6      | 735.3                    | 75.2      | .017 <sup>c</sup>    | 0.872                       |
| Median                      | 774.0                | 217.9     | 1013.1                   | 71.2      | .018 <sup>c</sup>    | 0.872                       |
| SD                          | 506.4                | 13.4      | 495.0                    | 18.3      | .165                 | 0.735                       |
| Entropy                     | 6.012                | 0.048     | 5.894                    | 0.231     | .164                 | 0.726                       |
| Second SD                   | 93.76                | 28.70     | 59.85                    | 19.19     | .017 <sup>c</sup>    | 0.872                       |
| Range                       | 273.7                | 82.9      | 175.4                    | 54.5      | .017 <sup>c</sup>    | 0.863                       |
| Geometric mean              | 199.6                | 44.7      | 272.8                    | 63.8      | .032 <sup>c</sup>    | 0.829                       |
| Harmonic mean               | 22.18                | 3.65      | 26.79                    | 4.76      | .076                 | 0.769                       |
| IQR                         | 1060.7               | 22.4      | 988.9                    | 188.8     | .296                 | 0.718                       |
| Fourth moment               | 8.32E+10             | 5.65E+09  | 8.84E+10                 | 6.11E+09  | .152                 | 0.769                       |
| SD 5                        | 81.9                 | 29.4      | 16.8                     | 19.2      | .018 <sup>c</sup>    | 0.872                       |
| SD 9                        | 99.7                 | 49.3      | 19.5                     | 17.3      | .017 <sup>c</sup>    | 0.889                       |
| <b>GLCM</b>                 |                      |           |                          |           |                      |                             |
| Entropy                     | 0.728                | 0.079     | 0.673                    | 0.159     | .409                 | 0.598                       |
| Contrast                    | 113.1                | 20.2      | 84.1                     | 16.9      | .009 <sup>c</sup>    | 0.889                       |
| Correlation                 | 0.573                | 0.026     | 0.569                    | 0.012     | .713                 | 0.641                       |
| Energy                      | 0.036                | 0.019     | 0.081                    | 0.047     | .025 <sup>c</sup>    | 0.812                       |
| Homogeneity                 | 0.451                | 0.065     | 0.542                    | 0.069     | .020 <sup>c</sup>    | 0.821                       |
| <b>GLRL</b>                 |                      |           |                          |           |                      |                             |
| SRE                         | 0.177                | 0.007     | 0.157                    | 0.009     | <.001 <sup>c</sup>   | 0.966 <sup>d</sup>          |
| LRE                         | 0.197                | 0.010     | 0.173                    | 0.012     | .001 <sup>c</sup>    | 0.957                       |
| GLN                         | 0.183                | 0.009     | 0.160                    | 0.011     | .001 <sup>c</sup>    | 0.949                       |
| RLN                         | 0.196                | 0.010     | 0.173                    | 0.012     | .002 <sup>c</sup>    | 0.932                       |
| RP                          | 353.0                | 11.2      | 364.5                    | 11.0      | .033 <sup>c</sup>    | 0.769                       |
| LGRE                        | 345.5                | 13.0      | 362.1                    | 11.9      | .013 <sup>c</sup>    | 0.821                       |
| HGRE                        | 345.7                | 11.0      | 361.1                    | 10.9      | .008 <sup>c</sup>    | 0.795                       |
| SRLGE                       | 346.6                | 13.3      | 361.8                    | 12.3      | .021 <sup>c</sup>    | 0.778                       |
| SRHGE                       | 233.7                | 53.0      | 318.9                    | 97.1      | .148                 | 0.812                       |
| LRLGE                       | 295.2                | 63.2      | 398.3                    | 99.8      | .063                 | 0.838                       |
| LRHGE                       | 224.6                | 51.8      | 300.0                    | 68.7      | .035 <sup>c</sup>    | 0.863                       |
| <b>Laws features</b>        |                      |           |                          |           |                      |                             |
| L1                          | 1,147,168.4          | 304,127.9 | 932,846.3                | 323,413.5 | .240                 | 0.705                       |
| L2                          | 388,225.1            | 181,690.3 | 261,871.2                | 121,634.4 | .127                 | 0.718                       |
| L3                          | 86,706.2             | 39,484.9  | 64,844.4                 | 29,506.6  | .267                 | 0.692                       |
| L4                          | 360,755.3            | 119,837.4 | 271,851.5                | 115,764.8 | .189                 | 0.718                       |
| L5                          | 131,888.8            | 59,529.3  | 87,225.0                 | 40,960.5  | .124                 | 0.731                       |
| L6                          | 73,453.5             | 30,964.3  | 57,877.2                 | 26,256.9  | .333                 | 0.641                       |
| L7                          | 56,206.3             | 24,679.3  | 440,57.0                 | 20,439.3  | .334                 | 0.654                       |
| L8                          | 88,611.4             | 36,512.6  | 75,856.4                 | 35,468.9  | .499                 | 0.615                       |
| L9                          | 153,050.3            | 71,083.8  | 119,186.0                | 51,125.5  | .314                 | 0.667                       |
| <b>GLGM</b>                 |                      |           |                          |           |                      |                             |
| MGR                         | 3.768                | 1.830     | 5.310                    | 4.040     | DNC                  | 0.598                       |
| VGR                         | 11,832.0             | 5859.3    | 16,712.0                 | 12,777.3  | DNC                  | 0.598                       |
| Skewness                    | 39.2                 | 10.9      | 36.2                     | 11.7      | .888                 | 0.504                       |
| Kurtosis                    | 1757.0               | 971.6     | 1539.7                   | 943.6     | .965                 | 0.504                       |

**Note:**—MGR indicates mean gradients; VGR, variance of gradients; SRHGE, short-run high gray-level emphasis; LRLGE, long-run low gray-level emphasis; DNC, did not converge.

<sup>a</sup> Indicates a significant difference by the mixed linear regression model (Proc MIXED) to adjust the variance-covariance matrix among multiple values recorded for each patient ( $P < .05$ ).

<sup>b</sup> Using the generalized linear mixed model (GLIMMROC).

<sup>c</sup> Significant.

<sup>d</sup> The highest AUC among 41 texture features.

**On-line Table 2: [<sup>18</sup>F] FDG-PET/CT characteristics and texture parameters differentiating lymph node characterization in patients with head and neck squamous cell carcinoma without HIV infection (group 3 vs 4)**

| Texture Parameter         | Benign Nodes (n = 39) |           | Malignant Nodes (n = 22) |           | P Value <sup>a</sup> | AUC <sup>b</sup> (GLIMMROC) |
|---------------------------|-----------------------|-----------|--------------------------|-----------|----------------------|-----------------------------|
|                           | Mean                  | SD        | Mean                     | SD        |                      |                             |
| Node characteristics      |                       |           |                          |           |                      |                             |
| Size (cm)                 | 1.439                 | 0.048     | 1.687                    | 0.831     | .079                 | 0.643                       |
| Volume (cm <sup>3</sup> ) | 1.122                 | 0.147     | 3.468                    | 4.718     | .001 <sup>c</sup>    | 0.702                       |
| SUVmax                    | 3.228                 | 0.315     | 6.438                    | 4.811     | .007 <sup>c</sup>    | 0.731                       |
| Histogram                 |                       |           |                          |           |                      |                             |
| Mean                      | 670.6                 | 68.4      | 751.8                    | 137.3     | .022 <sup>c</sup>    | 0.705                       |
| Median                    | 889.8                 | 150.6     | 966.2                    | 136.0     | .110                 | 0.674                       |
| SD                        | 508.5                 | 14.9      | 491.8                    | 35.9      | .051                 | 0.684                       |
| Entropy                   | 6.016                 | 0.083     | 5.877                    | 0.281     | .093                 | 0.669                       |
| Second SD                 | 81.23                 | 20.00     | 64.29                    | 30.34     | .067                 | 0.710                       |
| Range                     | 236.8                 | 57.7      | 186.8                    | 87.5      | .063                 | 0.704                       |
| Geometric mean            | 225.9                 | 50.6      | 297.6                    | 124.5     | .020 <sup>c</sup>    | 0.704                       |
| Harmonic mean             | 24.12                 | 4.21      | 29.57                    | 9.42      | .020 <sup>c</sup>    | 0.713                       |
| IQR                       | 1064.3                | 63.9      | 865.0                    | 360.2     | .022 <sup>c</sup>    | 0.723                       |
| Fourth moment             | 8.71E+10              | 5.74E+09  | 9.41E+10                 | 1.00E+10  | .018 <sup>c</sup>    | 0.719                       |
| SD 5                      | 70.3                  | 18.4      | 56.3                     | 27.1      | .093                 | 0.702                       |
| SD 9                      | 76.0                  | 26.4      | 56.4                     | 30.1      | .050                 | 0.719                       |
| GLCM                      |                       |           |                          |           |                      |                             |
| Entropy                   | 0.720                 | 0.089     | 0.654                    | 0.211     | .327                 | 0.662                       |
| Contrast                  | 102.5                 | 18.2      | 81.8                     | 28.3      | .015 <sup>c</sup>    | 0.754                       |
| Correlation               | 0.571                 | 0.023     | 0.585                    | 0.054     | .249                 | 0.660                       |
| Energy                    | 0.041                 | 0.022     | 0.072                    | 0.055     | .034 <sup>c</sup>    | 0.712                       |
| Homogeneity               | 0.475                 | 0.056     | 0.541                    | 0.104     | .029 <sup>c</sup>    | 0.735                       |
| GLRL                      |                       |           |                          |           |                      |                             |
| SRE                       | 0.164                 | 0.011     | 0.154                    | 0.019     | .036 <sup>c</sup>    | 0.695                       |
| LRE                       | 0.182                 | 0.013     | 0.171                    | 0.023     | .058                 | 0.690                       |
| GLN                       | 0.169                 | 0.013     | 0.160                    | 0.020     | .085                 | 0.678                       |
| RLN                       | 0.183                 | 0.014     | 0.170                    | 0.023     | .034 <sup>c</sup>    | 0.698                       |
| RP                        | 361.1                 | 13.2      | 361.6                    | 17.7      | .897                 | 0.593                       |
| LGRE                      | 357.0                 | 13.6      | 358.3                    | 19.1      | .762                 | 0.596                       |
| HGRE                      | 357.4                 | 12.6      | 357.0                    | 16.6      | .911                 | 0.604                       |
| SRLGE                     | 356.6                 | 14.2      | 358.4                    | 19.5      | .689                 | 0.600                       |
| SRHGE                     | 254.2                 | 77.2      | 367.0                    | 193.6     | .016 <sup>c</sup>    | 0.739                       |
| LRLGE                     | 322.6                 | 91.4      | 469.8                    | 231.9     | .006 <sup>c</sup>    | 0.759                       |
| LRHGE                     | 246.2                 | 60.5      | 352.7                    | 168.8     | .003 <sup>c</sup>    | 0.760 <sup>d</sup>          |
| Laws features             |                       |           |                          |           |                      |                             |
| L1                        | 1,130,272.9           | 280,670.9 | 876,676.6                | 413,942.2 | .024 <sup>c</sup>    | 0.722                       |
| L2                        | 371,685.0             | 154,845.3 | 261,999.9                | 163,324.6 | .028 <sup>c</sup>    | 0.721                       |
| L3                        | 84,684.4              | 28,548.0  | 63,767.4                 | 37,769.9  | .042 <sup>c</sup>    | 0.692                       |
| L4                        | 362,238.8             | 127,726.5 | 271,857.8                | 147,205.1 | .034 <sup>c</sup>    | 0.712                       |
| L5                        | 110,368.1             | 39,585.5  | 81,654.7                 | 56,071.2  | .047 <sup>c</sup>    | 0.695                       |
| L6                        | 74,901.6              | 26,669.0  | 53,389.7                 | 35,140.2  | .028 <sup>c</sup>    | 0.713                       |
| L7                        | 56,163.6              | 19,300.0  | 41,735.0                 | 26,088.3  | .040 <sup>c</sup>    | 0.697                       |
| L8                        | 99,735.3              | 44,247.6  | 68,408.7                 | 45,045.0  | .029 <sup>c</sup>    | 0.717                       |
| L9                        | 156,786.6             | 51,085.0  | 118,283.7                | 63,350.0  | .033 <sup>c</sup>    | 0.704                       |
| GLGM                      |                       |           |                          |           |                      |                             |
| MGR                       | 5.114                 | 5.517     | 7.193                    | 10.405    | .313                 | 0.594                       |
| VGR                       | 15,957.8              | 17,126.3  | 22,013.3                 | 318,54.8  | .315                 | 0.590                       |
| Skewness                  | 42.0                  | 16.1      | 42.0                     | 16.9      | .978                 | 0.594                       |
| Kurtosis                  | 2167.3                | 1381.5    | 2196.1                   | 1385.7    | .991                 | 0.597                       |

**Note:**—MGR indicates mean gradients; VGR, variance of gradients; SRHGE, short-run high gray-level emphasis; LRLGE, long-run low gray-level emphasis.

<sup>a</sup> Indicates a significant difference by the mixed linear regression model (Proc MIXED) to adjust the variance-covariance matrix among multiple values recorded for each patient ( $P < .05$ ).

<sup>b</sup> Using the generalized linear mixed model (GLIMMROC).

<sup>c</sup> Significant.

<sup>d</sup> The highest AUC among 41 texture features.

**On-line Table 3: [<sup>18</sup>F] FDG-PET/CT characteristics and texture parameters of benign lymph nodes differentiating HIV statuses (group 1 vs 3)**

| Parameter                 | HIV-Positive<br>(n = 9) |           | HIV-Negative<br>(n = 39) |           | P<br>Value <sup>a</sup> | AUC <sup>b</sup><br>(GLIMMROC) |
|---------------------------|-------------------------|-----------|--------------------------|-----------|-------------------------|--------------------------------|
|                           | Mean                    | SD        | Mean                     | SD        |                         |                                |
| Node characteristics      |                         |           |                          |           |                         |                                |
| Size (cm)                 | 1.400                   | 0.300     | 1.439                    | 0.297     | .781                    | 0.556                          |
| Volume (cm <sup>3</sup> ) | 0.547                   | 0.363     | 1.122                    | 0.921     | .137                    | 0.761                          |
| SUVmax                    | 5.111                   | 1.610     | 3.228                    | 1.966     | .111                    | 0.872                          |
| Histogram                 |                         |           |                          |           |                         |                                |
| Mean                      | 624.4                   | 74.6      | 670.6                    | 68.4      | .226                    | 0.670                          |
| Median                    | 774.0                   | 217.9     | 889.8                    | 150.6     | .231                    | 0.655                          |
| SD                        | 506.4                   | 13.4      | 508.5                    | 14.9      | .816                    | 0.541                          |
| Entropy                   | 6.012                   | 0.048     | 6.016                    | 0.083     | .897                    | 0.581                          |
| Second SD                 | 93.76                   | 28.70     | 81.23                    | 20.00     | .314                    | 0.598                          |
| Range                     | 273.7                   | 82.9      | 236.8                    | 57.7      | .295                    | 0.615                          |
| Geometric mean            | 199.6                   | 44.7      | 225.9                    | 50.6      | .323                    | 0.644                          |
| Harmonic mean             | 22.18                   | 3.65      | 24.12                    | 4.21      | .341                    | 0.627                          |
| IQR                       | 1060.7                  | 22.4      | 1064.3                   | 63.9      | .894                    | 0.670                          |
| Fourth moment             | 8.32E+10                | 5.65E+09  | 8.71E+10                 | 5.74E+09  | .108                    | 0.685                          |
| SD 5                      | 81.9                    | 29.4      | 70.3                     | 18.4      | .334                    | 0.587                          |
| SD 9                      | 99.7                    | 49.3      | 76.0                     | 26.4      | .168                    | 0.604                          |
| GLCM                      |                         |           |                          |           |                         |                                |
| Entropy                   | 0.728                   | 0.079     | 0.720                    | 0.089     | .588                    | 0.524                          |
| Contrast                  | 113.1                   | 20.2      | 102.5                    | 18.2      | .338                    | 0.647                          |
| Correlation               | 0.573                   | 0.026     | 0.571                    | 0.023     | .717                    | 0.530                          |
| Energy                    | 0.036                   | 0.019     | 0.041                    | 0.022     | .633                    | 0.553                          |
| Homogeneity               | 0.451                   | 0.065     | 0.475                    | 0.056     | .454                    | 0.587                          |
| GLRL                      |                         |           |                          |           |                         |                                |
| SRE                       | 0.177                   | 0.007     | 0.164                    | 0.011     | .017 <sup>d</sup>       | 0.826 <sup>c</sup>             |
| LRE                       | 0.197                   | 0.010     | 0.182                    | 0.013     | .027 <sup>d</sup>       | 0.818                          |
| GLN                       | 0.183                   | 0.009     | 0.169                    | 0.013     | .021 <sup>d</sup>       | 0.818                          |
| RLN                       | 0.196                   | 0.010     | 0.183                    | 0.014     | .061                    | 0.772                          |
| RP                        | 353.0                   | 11.2      | 361.1                    | 13.2      | .119                    | 0.678                          |
| LGRE                      | 345.5                   | 13.0      | 357.0                    | 13.6      | .044 <sup>d</sup>       | 0.715                          |
| HGRE                      | 345.7                   | 11.0      | 357.4                    | 12.6      | .012 <sup>d</sup>       | 0.749                          |
| SRLGE                     | 346.6                   | 13.3      | 356.6                    | 14.2      | .088                    | 0.678                          |
| SRHGE                     | 233.7                   | 53.0      | 254.2                    | 77.2      | .728                    | 0.576                          |
| LRLGE                     | 295.2                   | 63.2      | 322.6                    | 91.4      | .585                    | 0.590                          |
| LRHGE                     | 224.6                   | 51.8      | 246.2                    | 60.5      | .506                    | 0.618                          |
| Laws features             |                         |           |                          |           |                         |                                |
| L1                        | 1,147,168.4             | 304,127.9 | 1,130,272.9              | 280,670.9 | .983                    | 0.517                          |
| L2                        | 388,225.1               | 181,690.3 | 371,685.0                | 154,845.3 | .891                    | 0.505                          |
| L3                        | 86,706.2                | 39,484.9  | 84,684.4                 | 28,548.0  | .906                    | 0.524                          |
| L4                        | 360,755.3               | 119,837.4 | 362,238.8                | 127,726.5 | .922                    | 0.529                          |
| L5                        | 131,888.8               | 59,529.3  | 110,368.1                | 39,585.5  | .310                    | 0.605                          |
| L6                        | 73,453.5                | 30,964.3  | 74,901.6                 | 26,669.0  | .897                    | 0.524                          |
| L7                        | 56,206.3                | 24,679.3  | 56,163.6                 | 19,300.0  | .992                    | 0.510                          |
| L8                        | 88,611.4                | 36,512.6  | 99,735.3                 | 44,247.6  | .597                    | 0.567                          |
| L9                        | 153,050.3               | 71,083.8  | 156,786.6                | 51,085.0  | .879                    | 0.562                          |
| GLGM                      |                         |           |                          |           |                         |                                |
| MGR                       | 3.768                   | 1.830     | 5.114                    | 5.517     | .486                    | 0.533                          |
| VGR                       | 11,832.0                | 5859.3    | 15,957.8                 | 17,126.3  | .490                    | 0.516                          |
| Skewness                  | 39.2                    | 10.9      | 42.0                     | 16.1      | .688                    | 0.547                          |
| Kurtosis                  | 1757.0                  | 971.6     | 2167.3                   | 1381.5    | .467                    | 0.550                          |

**Note:**—MGR indicates mean gradients; VGR, variance of gradients; SRHGE, short-run high gray-level emphasis; LRLGE, long-run low gray-level emphasis.

<sup>a</sup> Indicates a significant difference by the mixed linear regression model (Proc MIXED) to adjust the variance-covariance matrix among multiple values recorded for each patient ( $P < .05$ ).

<sup>b</sup> Using the generalized linear mixed model (GLIMMROC).

<sup>c</sup> The highest AUC among 41 texture features.

<sup>d</sup> Significant.

**On-line Table 4: [<sup>18</sup>F] FDG-PET/CT characteristics and texture parameters of malignant lymph nodes differentiating between HIV statuses (group 2 vs 4)**

| Parameter                 | HIV-Positive<br>(n = 13) |           | HIV-Negative<br>(n = 22) |           | P<br>Value <sup>a</sup> | AUC <sup>b</sup><br>(GLIMMROC) |
|---------------------------|--------------------------|-----------|--------------------------|-----------|-------------------------|--------------------------------|
|                           | Mean                     | SD        | Mean                     | SD        |                         |                                |
| Node characteristics      |                          |           |                          |           |                         |                                |
| Size (cm)                 | 1.892                    | 0.690     | 1.687                    | 0.831     | .186                    | 0.601                          |
| Volume (cm <sup>3</sup> ) | 2.535                    | 2.218     | 3.468                    | 4.718     | .409                    | 0.549                          |
| SUVmax                    | 8.562                    | 3.886     | 6.438                    | 4.811     | .192                    | 0.673                          |
| Histogram                 |                          |           |                          |           |                         |                                |
| Mean                      | 735.3                    | 75.2      | 751.8                    | 137.3     | .876                    | 0.594                          |
| Median                    | 1013.1                   | 71.2      | 966.2                    | 136.0     | .288                    | 0.566                          |
| SD                        | 495.0                    | 18.3      | 491.8                    | 35.9      | .927                    | 0.598                          |
| Entropy                   | 5.894                    | 0.231     | 5.877                    | 0.281     | .947                    | 0.615                          |
| Second SD                 | 59.85                    | 19.19     | 64.29                    | 30.34     | .503                    | 0.577                          |
| Range                     | 175.4                    | 54.5      | 186.8                    | 87.5      | .521                    | 0.580                          |
| Geometric mean            | 272.8                    | 63.8      | 297.6                    | 124.5     | .706                    | 0.591                          |
| Harmonic mean             | 26.79                    | 4.76      | 29.57                    | 9.42      | .510                    | 0.598                          |
| IQR                       | 988.9                    | 188.8     | 865.0                    | 360.2     | .459                    | 0.615                          |
| Fourth moment             | 8.84E+10                 | 6.11E+09  | 9.41E+10                 | 1.00E+10  | .200                    | 0.692                          |
| SD 5                      | 16.8                     | 19.2      | 56.3                     | 27.1      | .371                    | 0.584                          |
| SD 9                      | 19.5                     | 17.3      | 56.4                     | 30.1      | .321                    | 0.591                          |
| GLCM                      |                          |           |                          |           |                         |                                |
| Entropy                   | 0.673                    | 0.159     | 0.654                    | 0.211     | .886                    | 0.601                          |
| Contrast                  | 84.1                     | 16.9      | 81.8                     | 28.3      | .945                    | 0.587                          |
| Correlation               | 0.569                    | 0.012     | 0.585                    | 0.054     | .468                    | 0.661                          |
| Energy                    | 0.081                    | 0.047     | 0.072                    | 0.055     | .619                    | 0.633                          |
| Homogeneity               | 0.542                    | 0.069     | 0.541                    | 0.104     | .776                    | 0.594                          |
| GLRL                      |                          |           |                          |           |                         |                                |
| SRE                       | 0.157                    | 0.009     | 0.154                    | 0.019     | .833                    | 0.610                          |
| LRE                       | 0.173                    | 0.012     | 0.171                    | 0.023     | .976                    | 0.610                          |
| GLN                       | 0.160                    | 0.011     | 0.160                    | 0.020     | .942                    | 0.608                          |
| RLN                       | 0.173                    | 0.012     | 0.170                    | 0.023     | .918                    | 0.608                          |
| RP                        | 364.5                    | 11.0      | 361.6                    | 17.7      | .594                    | 0.584                          |
| LGRE                      | 362.1                    | 11.9      | 358.3                    | 19.1      | .445                    | 0.622                          |
| HGRE                      | 361.1                    | 10.9      | 357.0                    | 16.6      | .444                    | 0.622                          |
| SRLGE                     | 361.8                    | 12.3      | 358.4                    | 19.5      | .519                    | 0.619                          |
| SRHGE                     | 318.9                    | 97.1      | 367.0                    | 193.6     | .453                    | 0.563                          |
| LRLGE                     | 398.3                    | 99.8      | 469.8                    | 231.9     | .379                    | 0.615                          |
| LRHGE                     | 300.0                    | 68.7      | 352.7                    | 168.8     | .338                    | 0.626                          |
| Laws features             |                          |           |                          |           |                         |                                |
| L1                        | 932,846.3                | 323,413.5 | 876,676.6                | 41,3942.2 | .868                    | 0.601                          |
| L2                        | 26,1871.2                | 121,634.4 | 261,999.9                | 163,324.6 | .853                    | 0.577                          |
| L3                        | 64,844.4                 | 29,506.6  | 63,767.4                 | 37,769.9  | .896                    | 0.563                          |
| L4                        | 271,851.5                | 115,764.8 | 271,857.8                | 147,205.1 | .859                    | 0.577                          |
| L5                        | 87,225.0                 | 40,960.5  | 81,654.7                 | 56,071.2  | .987                    | 0.545                          |
| L6                        | 57,877.2                 | 26,256.9  | 53,389.7                 | 35140.2   | .917                    | 0.577                          |
| L7                        | 44,057.0                 | 20,439.3  | 41,735.0                 | 26,088.3  | .993                    | 0.573                          |
| L8                        | 75,856.4                 | 35,468.9  | 68,408.7                 | 45,045.0  | .872                    | 0.580                          |
| L9                        | 119,186.0                | 51,125.5  | 118,283.7                | 63,350.0  | .856                    | 0.577                          |
| GLGM                      |                          |           |                          |           |                         |                                |
| MGR                       | 5.310                    | 4.040     | 7.193                    | 10.405    | DNC                     | 0.633                          |
| VGR                       | 16,712.0                 | 12,777.3  | 22,013.3                 | 31,854.8  | .469                    | 0.633                          |
| Skewness                  | 36.2                     | 11.7      | 42.0                     | 16.9      | .597                    | 0.517                          |
| Kurtosis                  | 1539.7                   | 943.6     | 2196.1                   | 1385.7    | .515                    | 0.552                          |

**Note:**—MGR indicates mean gradients; VGR, variance of gradients; SRHGE, short-run high gray-level emphasis; LRLGE, long-run low gray-level emphasis; DNC, did not converge.

<sup>a</sup> Indicates a significant difference by the mixed linear regression model (Proc MIXED) to adjust the variance-covariance matrix among multiple values recorded for each patient ( $P < .05$ ).

<sup>b</sup> Using the generalized linear mixed model (GLIMMROC).

**On-line Table 5: P value and AUC results of the subanalysis of selected texture features without and with exclusion of obvious necrotic parts to differentiate benign versus malignant lymph nodes in patients with HIV (group 1 vs 2)**

| Texture Parameter | Without Exclusion of Obvious Necrotic Components |                             | With Exclusion of Obvious Necrotic Components |                             |
|-------------------|--------------------------------------------------|-----------------------------|-----------------------------------------------|-----------------------------|
|                   | P Value <sup>a</sup>                             | AUC <sup>b</sup> (GLIMMROC) | P Value <sup>a</sup>                          | AUC <sup>b</sup> (GLIMMROC) |
| Histogram         |                                                  |                             |                                               |                             |
| Mean              | .017 <sup>c</sup>                                | 0.872                       | .037 <sup>c</sup>                             | 0.846                       |
| Median            | .018 <sup>c</sup>                                | 0.872                       | .058                                          | 0.829                       |
| 2D SD             | .017 <sup>c</sup>                                | 0.872                       | .041 <sup>c</sup>                             | 0.829                       |
| Range             | .017 <sup>c</sup>                                | 0.863                       | .037 <sup>c</sup>                             | 0.829                       |
| Geometric mean    | .032 <sup>c</sup>                                | 0.829                       | .042 <sup>c</sup>                             | 0.838                       |
| SD 5              | .018 <sup>c</sup>                                | 0.872                       | .043 <sup>c</sup>                             | 0.821                       |
| SD 9              | .017 <sup>c</sup>                                | 0.889                       | .034 <sup>c</sup>                             | 0.855                       |
| GLCM              |                                                  |                             |                                               |                             |
| Contrast          | .009 <sup>c</sup>                                | 0.889                       | .031 <sup>c</sup>                             | 0.846                       |
| Energy            | .025 <sup>c</sup>                                | 0.812                       | .045 <sup>c</sup>                             | 0.795                       |
| Homogeneity       | .020 <sup>c</sup>                                | 0.821                       | .036 <sup>c</sup>                             | 0.821                       |
| GLRL              |                                                  |                             |                                               |                             |
| SRE               | <.001 <sup>c</sup>                               | 0.966 <sup>d</sup>          | .011 <sup>c</sup>                             | 0.872                       |
| LRE               | .001 <sup>c</sup>                                | 0.957                       | .021 <sup>c</sup>                             | 0.889 <sup>d</sup>          |
| GLN               | .001 <sup>c</sup>                                | 0.949                       | .020 <sup>c</sup>                             | 0.872                       |
| RLN               | .002 <sup>c</sup>                                | 0.932                       | .026 <sup>c</sup>                             | 0.889 <sup>d</sup>          |
| RP                | .033 <sup>c</sup>                                | 0.769                       | .065                                          | 0.752                       |
| LGRE              | .013 <sup>c</sup>                                | 0.821                       | .048 <sup>c</sup>                             | 0.778                       |
| HGRE              | .008 <sup>c</sup>                                | 0.795                       | .023 <sup>c</sup>                             | 0.769                       |
| SRLGE             | .021 <sup>c</sup>                                | 0.778                       | .062                                          | 0.752                       |
| LRHGE             | .035 <sup>c</sup>                                | 0.863                       | .079                                          | 0.812                       |

<sup>a</sup>Indicates a significant difference by the mixed linear regression model (Proc MIXED) to adjust the variance-covariance matrix among multiple values recorded for each patient ( $P < .05$ ).

<sup>b</sup>Using the generalized linear mixed model (GLIMMROC).

<sup>c</sup>Significant.

<sup>d</sup>The highest AUC among 41 texture features.

**On-line Table 6: P value and AUC results of the subanalysis of selected texture features without and with exclusion of obvious necrotic parts to differentiate benign versus malignant lymph nodes in patients without HIV (group 3 vs 4)**

| Texture Parameter | Without Exclusion of Obvious Necrotic Components |                             | With Exclusion of Obvious Necrotic Components |                             |
|-------------------|--------------------------------------------------|-----------------------------|-----------------------------------------------|-----------------------------|
|                   | P Value <sup>a</sup>                             | AUC <sup>b</sup> (GLIMMROC) | P Value <sup>a</sup>                          | AUC <sup>b</sup> (GLIMMROC) |
| Histogram         |                                                  |                             |                                               |                             |
| Mean              | .022 <sup>c</sup>                                | 0.705                       | .059                                          | 0.672                       |
| Geometric mean    | .020 <sup>c</sup>                                | 0.704                       | .043 <sup>c</sup>                             | 0.667                       |
| Harmonic mean     | .020 <sup>c</sup>                                | 0.713                       | .035 <sup>c</sup>                             | 0.678                       |
| IQR               | .022 <sup>c</sup>                                | 0.723                       | DNC                                           | 0.682                       |
| Fourth moment     | .018 <sup>c</sup>                                | 0.719                       | .032 <sup>c</sup>                             | 0.698                       |
| GLCM              |                                                  |                             |                                               |                             |
| Contrast          | .015 <sup>c</sup>                                | 0.754                       | .047 <sup>c</sup>                             | 0.720                       |
| Energy            | .034 <sup>c</sup>                                | 0.712                       | .037 <sup>c</sup>                             | 0.679                       |
| Homogeneity       | .029 <sup>c</sup>                                | 0.735                       | .075                                          | 0.702                       |
| GLRL              |                                                  |                             |                                               |                             |
| SRE               | .036 <sup>c</sup>                                | 0.695                       | .160                                          | 0.702                       |
| RLN               | .034 <sup>c</sup>                                | 0.698                       | .113                                          | 0.667                       |
| SRHGE             | .016 <sup>c</sup>                                | 0.739                       | .010 <sup>c</sup>                             | 0.710                       |
| LRLGE             | .006 <sup>c</sup>                                | 0.759 <sup>d</sup>          | .003 <sup>c</sup>                             | 0.728 <sup>d</sup>          |
| LRHGE             | .003 <sup>c</sup>                                | 0.760                       | <.001 <sup>c</sup>                            | 0.726                       |
| Laws features     |                                                  |                             |                                               |                             |
| L1                | .024 <sup>c</sup>                                | 0.722                       | .097                                          | 0.671                       |
| L2                | .028 <sup>c</sup>                                | 0.721                       | .110                                          | 0.677                       |
| L3                | .042 <sup>c</sup>                                | 0.692                       | .143                                          | 0.648                       |
| L4                | .034 <sup>c</sup>                                | 0.712                       | .137                                          | 0.666                       |
| L5                | .047 <sup>c</sup>                                | 0.695                       | .145                                          | 0.639                       |
| L6                | .028 <sup>c</sup>                                | 0.713                       | .112                                          | 0.660                       |
| L7                | .040 <sup>c</sup>                                | 0.697                       | .143                                          | 0.644                       |
| L8                | .029 <sup>c</sup>                                | 0.717                       | .124                                          | 0.670                       |
| L9                | .033 <sup>c</sup>                                | 0.704                       | .112                                          | 0.658                       |

<sup>a</sup> Indicates a significant difference by the mixed linear regression model (Proc MIXED) to adjust the variance-covariance matrix among multiple values recorded for each patient ( $P < .05$ ).

<sup>b</sup> Using the generalized linear mixed model (GLIMMROC).

<sup>c</sup> Significant.



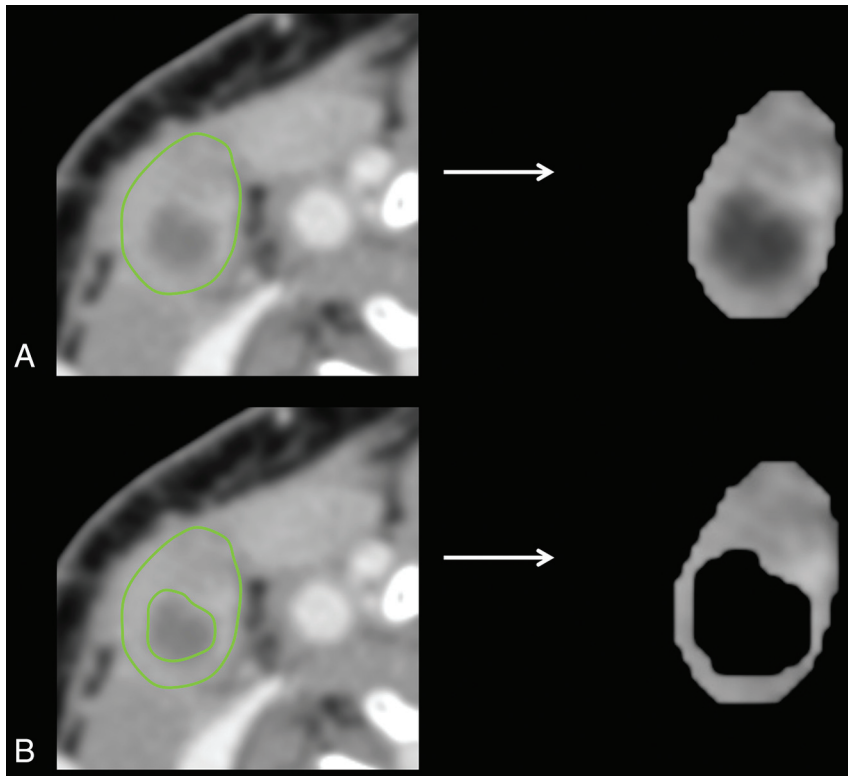

**ON-LINE FIGURE.** Workflow for image segmentation. Whole segmentation of lymph nodes was performed for each slice for primary analysis (A). For subanalysis in the inclusion or exclusion of necrosis parts of selected texture parameters differentiating among lymph node characterizations. Obvious necrotic or cystic areas within the lymph node were manually excluded (B).
